# Supplementary material for: The future of a partially effective HIV vaccine: assessing limitations at the population level
Source: PubMed Central journal article supplement (PMC6614161; doi:10.1007/s00038-019-01234-z), 2019-04-13
Supplement: 38_2019_1234_MOESM1_ESM.pdf [file 38_2019_1234_MOESM1_ESM.pdf]

**Supplementary Material for:  
The future of a partially effective HIV vaccine: assessing limitations at the  
population level**

**blinded authors**

Received: date / Accepted: date

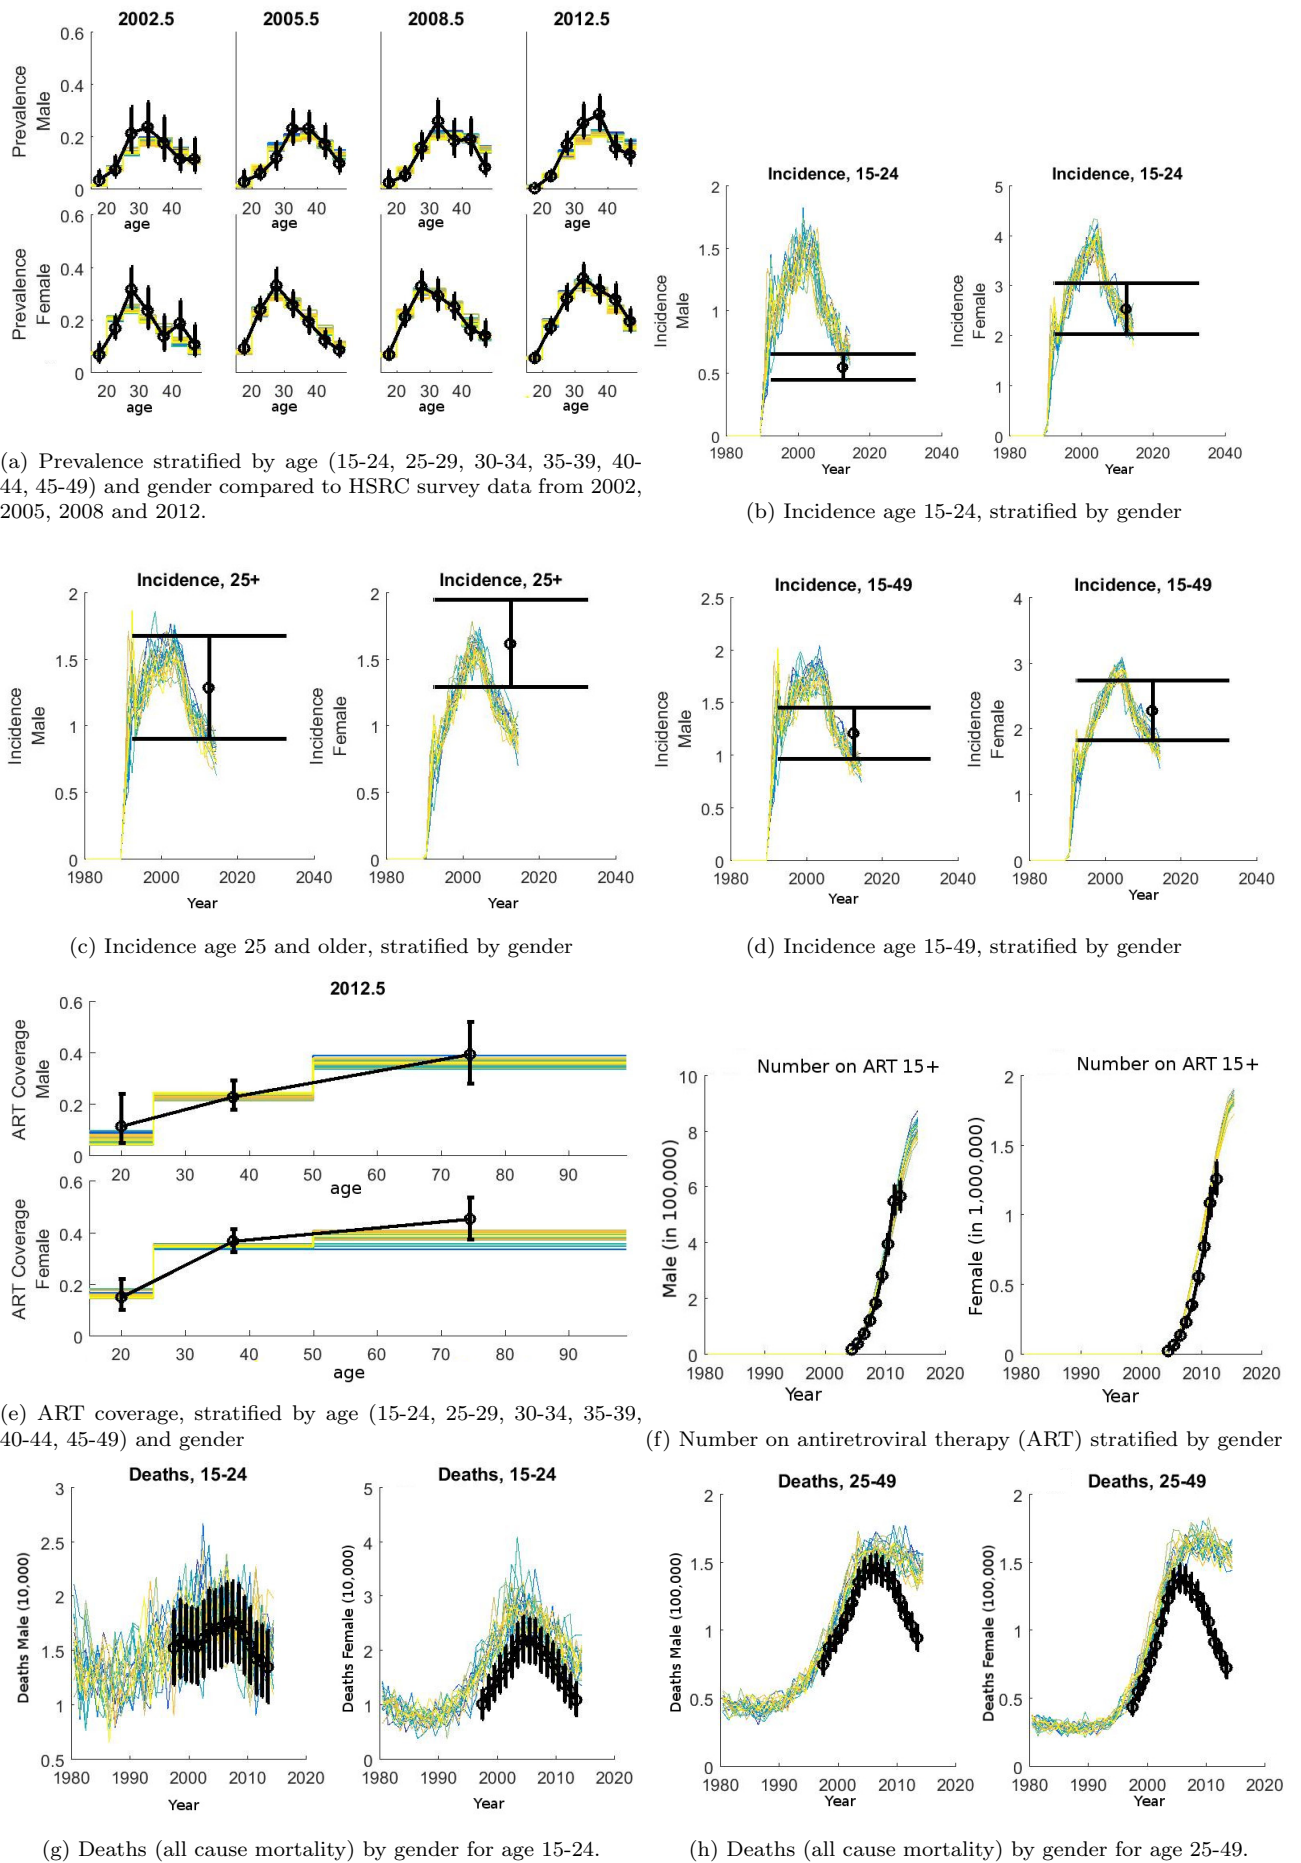

Fig. 1: Results of model calibration (trajectories in colors) to incidence, prevalence, ART coverage and all-cause mortality estimates [? ? ? ? ? ?] for South Africa (black).

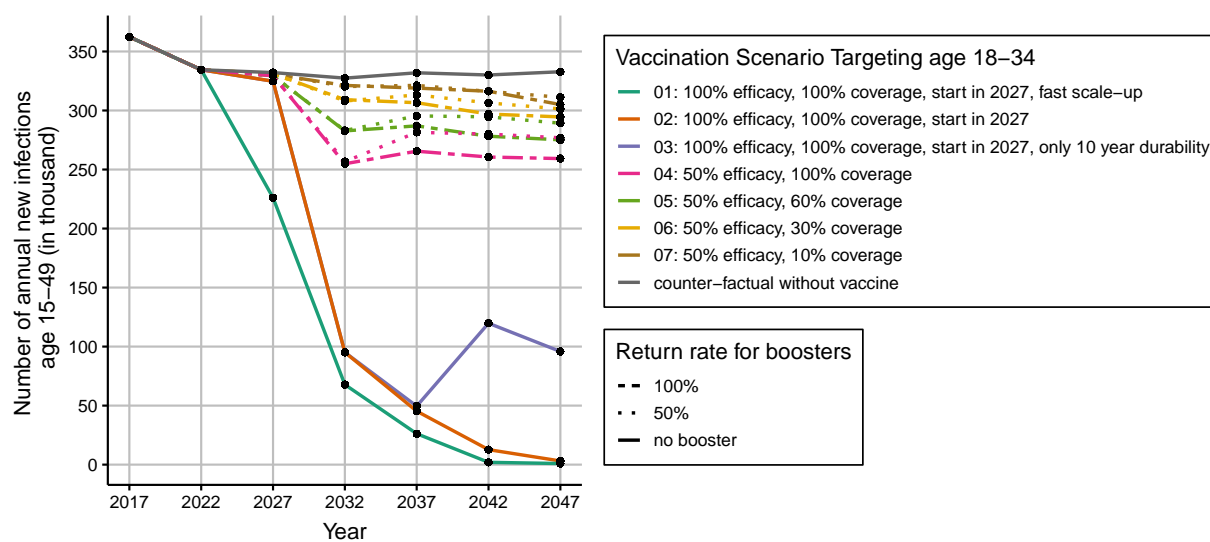

Fig. 2: Number of annual new infections (in thousand) under different vaccination scenarios. Note: the rise in annual new infection between 2037 and 2042 for scenario 3 stems from the fact that in 2037 vaccine efficacy is abruptly set to zero for those having received the vaccine ten year before during catch-up vaccination and that this cannot be compensated by cohort vaccination introduced in 2032. Similar conclusions hold for scenarios 4–7 where partial and waning efficacy for catch-up vaccines expires after five years, if booster vaccination is not maintained.

| Parameter modified during model calibration             | Parameter value (95% CI)              |
|---------------------------------------------------------|---------------------------------------|
| Base_Infectivity                                        | 0.000852 (0.00082-0.000885)           |
| TRANSITORY_Formation_Rate_Constant                      | 0.000911 (0.000872-0.000951)          |
| INFORMAL_Formation_Rate_Constant                        | 0.000744 (0.000703-0.000787)          |
| MARITAL_Formation_Rate_Constant                         | 6.1e-05 (5.9e-05-6.3e-05)             |
| Male_To_Female_Relative_Infectivity_Multipliers         | 4.506283 (4.433338-4.574492)          |
| Defaults_TRANSITORY_Condom_Usage_Probability_Mid        | 2006.163945 (2005.883396-2006.444411) |
| Defaults_TRANSITORY_Condom_Usage_Probability_Rate       | 2.428776 (2.297637-2.554955)          |
| Defaults_TRANSITORY_Condom_Usage_Probability_Max        | 0.620835 (0.600207-0.641391)          |
| Defaults_INFORMAL_Condom_Usage_Probability_Mid          | 1997.618152 (1996.72279-1998.576731)  |
| Defaults_INFORMAL_Condom_Usage_Probability_Rate         | 0.779877 (0.663685-0.899579)          |
| Defaults_INFORMAL_Condom_Usage_Probability_Max          | 0.345952 (0.328258-0.363927)          |
| Defaults_MARITAL_Condom_Usage_Probability_Mid           | 1999.249259 (1998.546359-2000.029841) |
| Defaults_MARITAL_Condom_Usage_Probability_Rate          | 2.668629 (2.61344-2.721196)           |
| Defaults_MARITAL_Condom_Usage_Probability_Max           | 0.242031 (0.231149-0.251669)          |
| Initial_Distribution_Risk3                              | 0.227233 (0.216862-0.237837)          |
| Weighting_Matrix_RowMale_ColumnFemale_RiskAssortivity   | 0.352385 (0.312122-0.389567)          |
| TRANSITORY_LOW_Prob_Extra_Relationship_Male             | 0.361095 (0.347754-0.375162)          |
| TRANSITORY_MEDIUM_Prob_Extra_Relationship_Male          | 0.740209 (0.720398-0.759972)          |
| TRANSITORY_LOW_Prob_Extra_Relationship_Female           | 0.162258 (0.151891-0.17433)           |
| TRANSITORY_MEDIUM_Prob_Extra_Relationship_Female        | 0.445975 (0.419467-0.474465)          |
| INFORMAL_LOW_Prob_Extra_Relationship_Male               | 0.422101 (0.399975-0.446544)          |
| INFORMAL_LOW_Prob_Extra_Relationship_Female             | 0.134696 (0.120834-0.148558)          |
| TRANSITORY_LOW_Max_Simultaneous_Relationships_Male      | 1.708727 (1.679571-1.737707)          |
| TRANSITORY_LOW_Max_Simultaneous_Relationships_Female    | 1.211347 (1.157796-1.262011)          |
| INFORMAL_LOW_Max_Simultaneous_Relationships_Male        | 1.211347 (1.161407-1.263891)          |
| INFORMAL_LOW_Max_Simultaneous_Relationships_Female      | 0.44122 (0.430161-0.452414)           |
| INFORMAL_MEDIUM_Prob_Extra_Relationship_Male            | 0.172667 (0.157184-0.189508)          |
| INFORMAL_MEDIUM_Prob_Extra_Relationship_Female          | 2.610953 (2.543659-2.68037)           |
| TRANSITORY_MEDIUM_Max_Simultaneous_Relationships_Male   | 2.610953 (2.541772-2.682377)          |
| TRANSITORY_MEDIUM_Max_Simultaneous_Relationships_Female | 1.571329 (1.462857-1.67974)           |
| INFORMAL_MEDIUM_Max_Simultaneous_Relationships_Male     | 1.571329 (1.462112-1.685857)          |
| INFORMAL_MEDIUM_Max_Simultaneous_Relationships_Female   | 0.945246 (0.930262-0.961531)          |
| MARITAL_MEDIUM_Max_Simultaneous_Relationships_Male      | 0.945246 (0.930657-0.962727)          |
| MARITAL_MEDIUM_Max_Simultaneous_Relationships_Female    |                                       |

Table 1: Model parameters used during calibration process. We used the 50 best simulations to calculate the average and boot-strapped 95% confidence intervals. We refer to extensive online documentation (<http://idmod.org/docs/hiv/parameter-overview.html>) for further information on model parameters.

## References

- . Eaton JW, Bacar N, Bershteyn A, Cambiano V, Cori A, Dorrington RE, Fraser C, Gopalappa C, Hontelez JAC, Johnson LF, Klein DJ, Phillips AN, Pretorius C, Stover J, Rehle TM, Hallett TB (2015) Assessment of epidemic projections using recent HIV survey data in South Africa: a validation analysis of ten mathematical models of HIV epidemiology in the antiretroviral therapy era. *Lancet Glob Health* 3(10):e598–608, DOI 10.1016/S2214-109X(15)00080-7
- . Rehle T, Shisana O, Pillay V, Zuma K, Puren A, Parker W (2007) National HIV incidence measures—new insights into the South African epidemic. *S Afr Med J* 97(3):194–9
- . Shisana O, Simbayi L (2002) Nelson Mandela/HSRC study of HIV/AIDS: South African national HIV prevalence, behavioural risks and mass media: household survey 2002. HSRC Press
- . Shisana O, Rehle T, Simbayi L, Zuma K, Jooste S, Pillay-Van Wyk V, Mbelle N, Van Zyl J, Parker W, Zungu N, Pezi S, SABSSM III Implementation Team (2010) South African National HIV Prevalence, Incidence, Behaviour and Communication Survey 2008: A Turning Tide Among Teenagers? HSRC Press, Cape Town
- . Shisana O, Rehle T, LC S, Zuma K, Jooste S, N Z, Labadarios D, Onoya D, Wabiri N (2014) South African National HIV Prevalence, Incidence and Behaviour Survey 2012. HSRC Press, Cape Town, URL <http://www.hsrc.ac.za/uploads/pageContent/4565/SABSSMIVLEOfinal.pdf>
- . Statistics South Africa (2014) Mortality and causes of death in South Africa, 2012: findings from death notification/Statistics South Africa.
